# Supplementary material for: Comparative Analysis of Fecal Microbiota in Infants with and without Eczema
Source: PubMed Central journal article supplement (PMC2848600; doi:10.1371/journal.pone.0009964), 2010-04-01
Supplement: pone.0009964.s004.pdf [file pone.0009964.s004.pdf]

Figure S1A

1 month

3 months

12 months

24 months

C-1

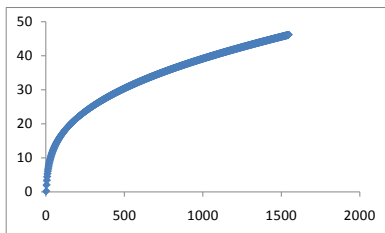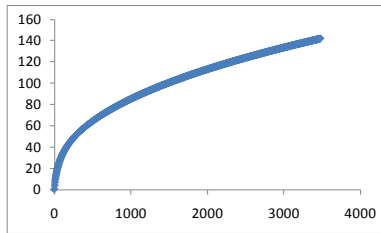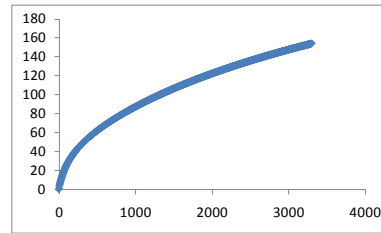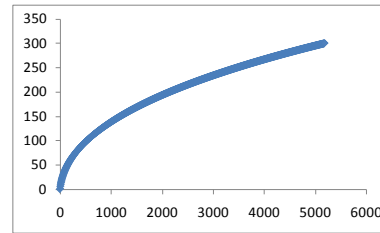

C-2

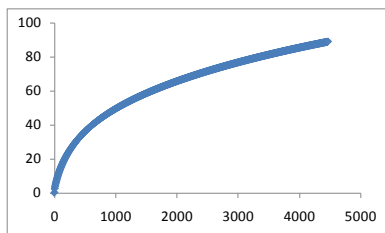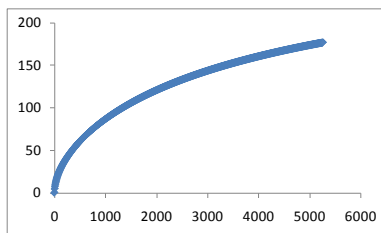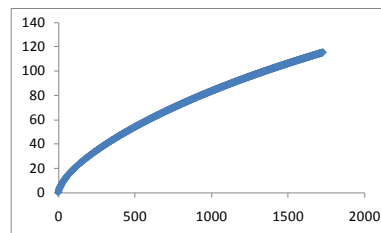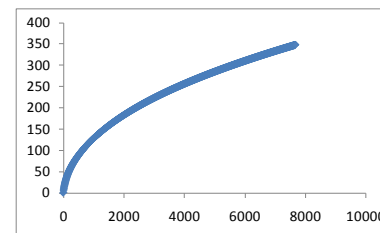

C-3

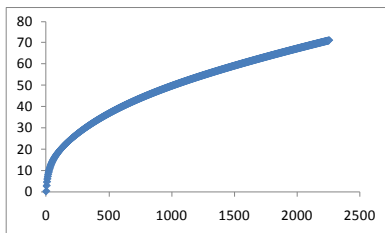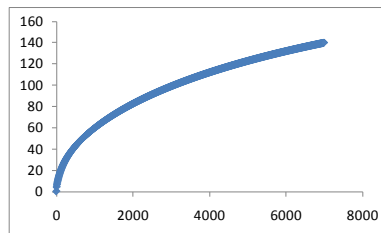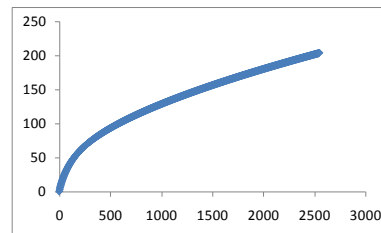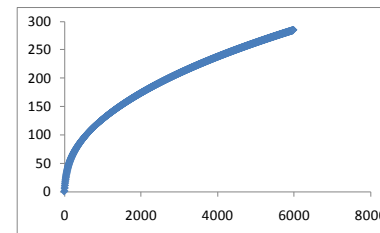

C-4

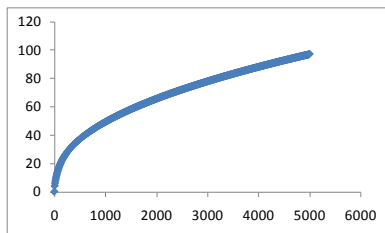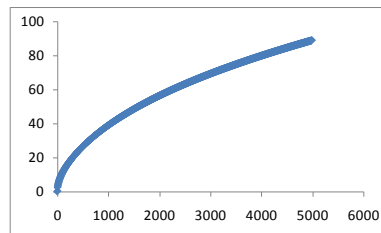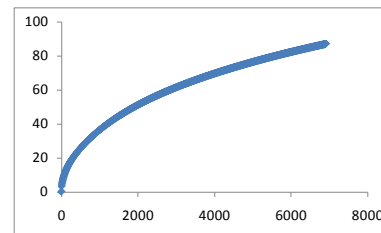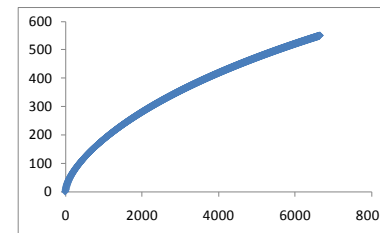

Figure S1B

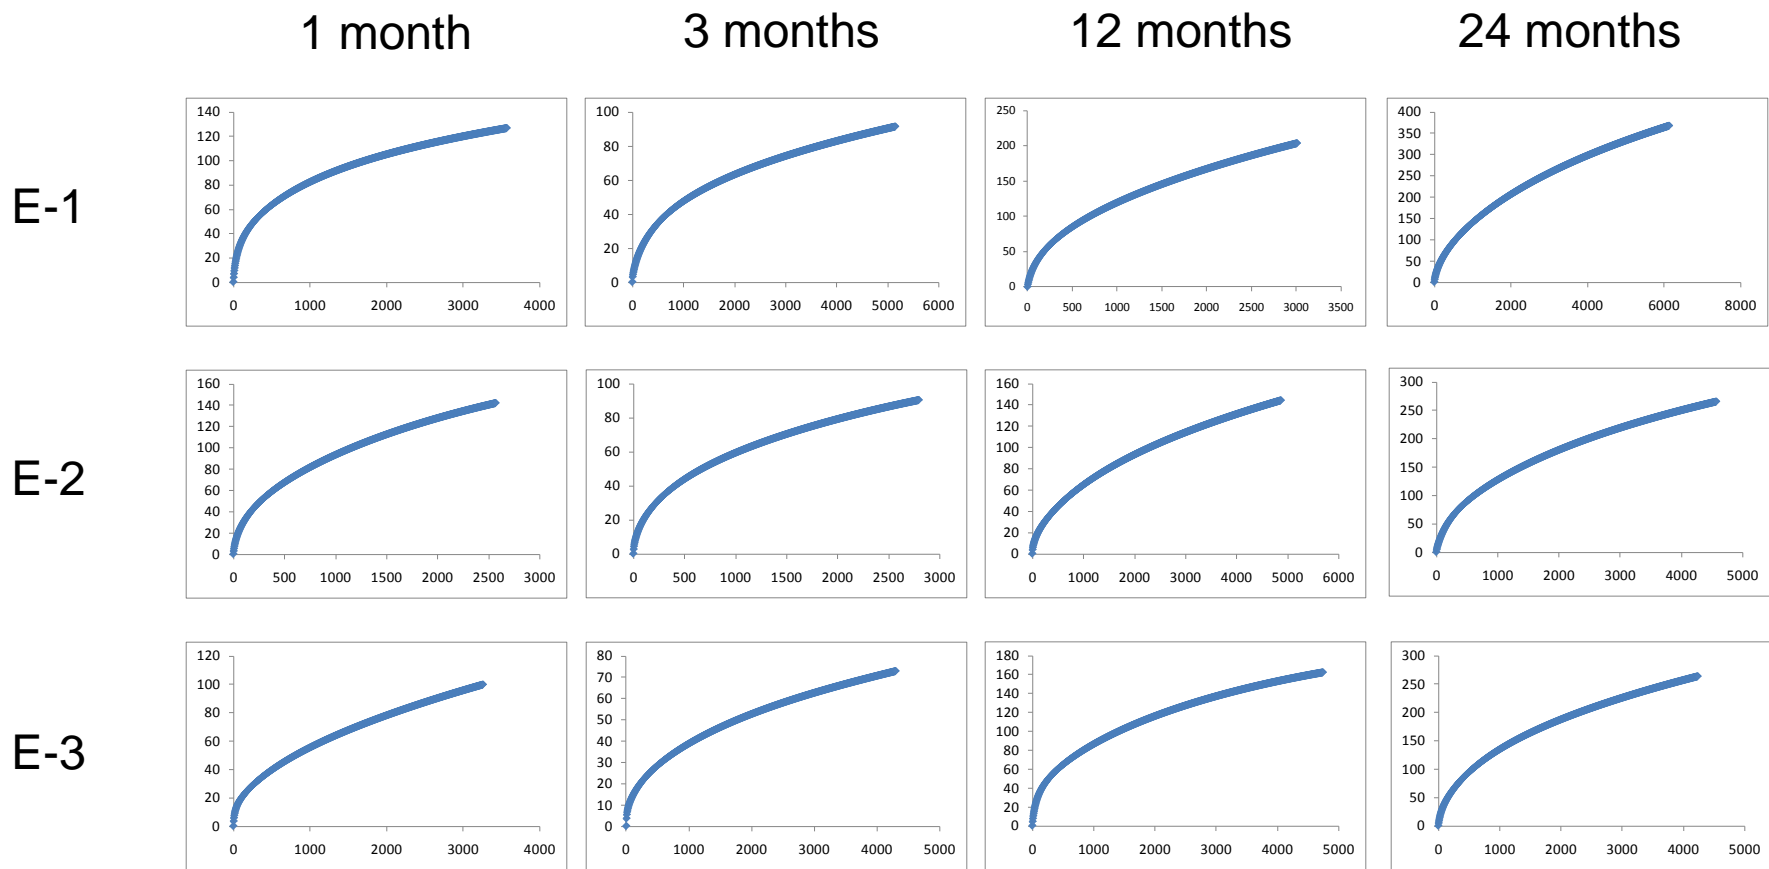

**Figure S1.** Rarefaction curves. The number of operational taxonomic units (OTUs) defined at 97% similarity was denoted along vertical y-axis, and plotted against the number of 16S pyrotags sequenced (x-axis). (A) Rarefaction curves for non-eczema control infants C-1 to C4. (B) Rarefaction curves for eczema infants, E-1 to E-3.
